# Supplementary material
Source: PubMed Central journal article supplement (PMC11471555)
Supplement: 41587_2023_2024_MOESM2_ESM.pdf [file 41587_2023_2024_MOESM2_ESM.pdf]

## Reporting Summary

Nature Portfolio wishes to improve the reproducibility of the work that we publish. This form provides structure for consistency and transparency in reporting. For further information on Nature Portfolio policies, see our [Editorial Policies](#) and the [Editorial Policy Checklist](#).

### Statistics

For all statistical analyses, confirm that the following items are present in the figure legend, table legend, main text, or Methods section.

n/a Confirmed

- The exact sample size ( $n$ ) for each experimental group/condition, given as a discrete number and unit of measurement
- A statement on whether measurements were taken from distinct samples or whether the same sample was measured repeatedly
- The statistical test(s) used AND whether they are one- or two-sided  
*Only common tests should be described solely by name; describe more complex techniques in the Methods section.*
- A description of all covariates tested
- A description of any assumptions or corrections, such as tests of normality and adjustment for multiple comparisons
- A full description of the statistical parameters including central tendency (e.g. means) or other basic estimates (e.g. regression coefficient) AND variation (e.g. standard deviation) or associated estimates of uncertainty (e.g. confidence intervals)
- For null hypothesis testing, the test statistic (e.g.  $F$ ,  $t$ ,  $r$ ) with confidence intervals, effect sizes, degrees of freedom and  $P$  value noted  
*Give  $P$  values as exact values whenever suitable.*
- For Bayesian analysis, information on the choice of priors and Markov chain Monte Carlo settings
- For hierarchical and complex designs, identification of the appropriate level for tests and full reporting of outcomes
- Estimates of effect sizes (e.g. Cohen's  $d$ , Pearson's  $r$ ), indicating how they were calculated

*Our web collection on [statistics for biologists](#) contains articles on many of the points above.*

### Software and code

Policy information about [availability of computer code](#)

Data collection

We have now listed all programs with github links, versions and names in the supplementary table 20. the methods are all cited in the methods or main text.

| Software Name | Version       | Github URL                                                                                                                    |
|---------------|---------------|-------------------------------------------------------------------------------------------------------------------------------|
| minimap2      | v2.17-r941    | <a href="https://github.com/lh3/minimap2">https://github.com/lh3/minimap2</a>                                                 |
| samtools      | v1.13         | <a href="http://htslib.org/">http://htslib.org/</a>                                                                           |
| mosdepth      | v0.3.2        | <a href="https://github.com/brentp/mosdepth">https://github.com/brentp/mosdepth</a>                                           |
| dipcall       | v0.2          | <a href="https://github.com/lh3/dipcall">https://github.com/lh3/dipcall</a>                                                   |
| Truvari       | v2.1          | <a href="https://github.com/ACEnglish/truvari">https://github.com/ACEnglish/truvari</a>                                       |
| SVIM          | v1.4.2        | <a href="https://github.com/eldariont/svim">https://github.com/eldariont/svim</a>                                             |
| Sniffles      | v1.12         | <a href="https://github.com/fritzsedlazeck/Sniffles">https://github.com/fritzsedlazeck/Sniffles</a>                           |
| cuteSV        | v1.0.11       | <a href="https://github.com/tjiangHIT/cuteSV">https://github.com/tjiangHIT/cuteSV</a>                                         |
| pbsv          | v2.6.2        | <a href="https://github.com/PacificBiosciences/pbsv">https://github.com/PacificBiosciences/pbsv</a>                           |
| SnpSift       | v4.3t         | <a href="http://snpeff.sourceforge.net/SnpSift.html">http://snpeff.sourceforge.net/SnpSift.html</a>                           |
| SURVIVOR      | v1.0.7        | <a href="https://github.com/fritzsedlazeck/SURVIVOR">https://github.com/fritzsedlazeck/SURVIVOR</a>                           |
| Biopython     | v1.79         | <a href="http://biopython.org">http://biopython.org</a>                                                                       |
| Saphyr Gen2   |               | <a href="https://bionanogenomics.com/products/saphyr/">https://bionanogenomics.com/products/saphyr/</a>                       |
| Bionano Solve | v3.6          | <a href="https://bionanogenomics.com/technology/genome-assembly/">https://bionanogenomics.com/technology/genome-assembly/</a> |
| bwa mem       | v0.7.17-r1188 | <a href="http://bio-bwa.sourceforge.net/">http://bio-bwa.sourceforge.net/</a>                                                 |
| manta         | v1.6.0        | <a href="https://getmanta.com/">https://getmanta.com/</a>                                                                     |

svtyper v0.7.1 <https://github.com/hall-lab/svtyper>  
BCFtools v1.14 <http://samtools.sourceforge.net/mpileup.shtml>

#### Data analysis

Source code for Sniffles2 is available at <https://github.com/fritzsedlazeck/Sniffles> and <https://doi.org/10.5281/zenodo.8121996> the auxiliary scripts are available at <https://github.com/smolkm0/Sniffles2-Supplement> and <https://doi.org/10.5281/zenodo.8122060>

For manuscripts utilizing custom algorithms or software that are central to the research but not yet described in published literature, software must be made available to editors and reviewers. We strongly encourage code deposition in a community repository (e.g. GitHub). See the Nature Portfolio [guidelines for submitting code & software](#) for further information.

## Data

Policy information about [availability of data](#)

All manuscripts must include a [data availability statement](#). This statement should provide the following information, where applicable:

- Accession codes, unique identifiers, or web links for publicly available datasets
- A description of any restrictions on data availability
- For clinical datasets or third party data, please ensure that the statement adheres to our [policy](#)

GIAB HG002 PacBio HiFi data is hosted at the github server: [https://ftp-trace.ncbi.nlm.nih.gov/ReferenceSamples/giab/data/AshkenazimTrio/HG002\\_NA24385\\_son/PacBio\\_CCS\\_15kb/](https://ftp-trace.ncbi.nlm.nih.gov/ReferenceSamples/giab/data/AshkenazimTrio/HG002_NA24385_son/PacBio_CCS_15kb/)  
ONT HG002: [https://labs.epi2me.io/gm24385\\_q20\\_2021.10/](https://labs.epi2me.io/gm24385_q20_2021.10/)  
ONT HG00733: <https://www.internationalgenome.org/data-portal/search?q=HG00733> and [https://ftp.hgsc.bcm.edu/Software/Truvari/3.1/sample\\_vcfs/hg19/li/HG00733.vcf.gz](https://ftp.hgsc.bcm.edu/Software/Truvari/3.1/sample_vcfs/hg19/li/HG00733.vcf.gz)  
GIAB benchmark sets:  
Genome wide: [https://ftp-trace.ncbi.nlm.nih.gov/ReferenceSamples/giab/release/AshkenazimTrio/HG002\\_NA24385\\_son/NIST\\_SV\\_v0.6/](https://ftp-trace.ncbi.nlm.nih.gov/ReferenceSamples/giab/release/AshkenazimTrio/HG002_NA24385_son/NIST_SV_v0.6/)  
Medical regions: [https://ftp-trace.ncbi.nlm.nih.gov/ReferenceSamples/giab/release/AshkenazimTrio/HG002\\_NA24385\\_son/CMRG\\_v1.00/](https://ftp-trace.ncbi.nlm.nih.gov/ReferenceSamples/giab/release/AshkenazimTrio/HG002_NA24385_son/CMRG_v1.00/)

The 1000 genomes data sets of the three genomes were downloaded from : <https://github.com/human-pangenomics/hpgp-data> The dipcall results that we leveraged as benchmark are deposited at <https://github.com/smolkm0/Sniffles2-Supplement>

The other data sets have been made available over SRA. 31 Oxford Nanopore data sets that represent cases of Mendelian disorders have SRA bioproject ID PRJNA953021. MSA sample has bioproject ID PRJNA985263. The COLO829BL (normal) and COLO829 (tumor) ONT samples can be found with the ENA ID: PRJEB27698 (samples ERR2752451 and ERR2752452 respectively), and the Revio tumor/normal samples can be found in <https://downloads.paccloud.com/public/revio/2023Q2/COLO829/>

## Research involving human participants, their data, or biological material

Policy information about studies with [human participants or human data](#). See also policy information about [sex, gender \(identity/presentation\), and sexual orientation](#) and [race, ethnicity and racism](#).

|                                                                    |                                                                                                        |
|--------------------------------------------------------------------|--------------------------------------------------------------------------------------------------------|
| Reporting on sex and gender                                        | MSA sample: Male ; Mendelian samples gender information is reported in Table 1 in the main text        |
| Reporting on race, ethnicity, or other socially relevant groupings | MSA sample: british, no other info available<br>The Mendelian samples dont have reported race          |
| Population characteristics                                         | N/a for all participants. Population characteristics weren't recorded.                                 |
| Recruitment                                                        | MSA: Sample provided by Queen Square Brain Bank, UCL, UK. Had consented to brain donation and research |
| Ethics oversight                                                   | MSA: Ethics oversight London Central Ethics Research Committee (UK) REF /LO/0044                       |

Note that full information on the approval of the study protocol must also be provided in the manuscript.

## Field-specific reporting

Please select the one below that is the best fit for your research. If you are not sure, read the appropriate sections before making your selection.

Life sciences  Behavioural & social sciences  Ecological, evolutionary & environmental sciences

For a reference copy of the document with all sections, see [nature.com/documents/nr-reporting-summary-flat.pdf](https://nature.com/documents/nr-reporting-summary-flat.pdf)

## Life sciences study design

All studies must disclose on these points even when the disclosure is negative.

Sample size

|                 |                                                                                                                                              |
|-----------------|----------------------------------------------------------------------------------------------------------------------------------------------|
| Data exclusions | No samples were excluded as not applicable for study type.                                                                                   |
| Replication     | No replicates were produced as all these samples were genomic samples showing variant detection capabilities. not applicable for study type. |
| Randomization   | No randomization was performed as we didnt assess phenotypes. not applicable for study type.                                                 |
| Blinding        | No blinding was done as we didnt run statistical associations or other studies where this would be needed. not applicable for study type.    |

## Reporting for specific materials, systems and methods

We require information from authors about some types of materials, experimental systems and methods used in many studies. Here, indicate whether each material, system or method listed is relevant to your study. If you are not sure if a list item applies to your research, read the appropriate section before selecting a response.

### Materials & experimental systems

### Methods

| n/a                                 | Involvement in the study                               |
|-------------------------------------|--------------------------------------------------------|
| <input checked="" type="checkbox"/> | <input type="checkbox"/> Antibodies                    |
| <input checked="" type="checkbox"/> | <input type="checkbox"/> Eukaryotic cell lines         |
| <input checked="" type="checkbox"/> | <input type="checkbox"/> Palaeontology and archaeology |
| <input checked="" type="checkbox"/> | <input type="checkbox"/> Animals and other organisms   |
| <input checked="" type="checkbox"/> | <input type="checkbox"/> Clinical data                 |
| <input checked="" type="checkbox"/> | <input type="checkbox"/> Dual use research of concern  |
| <input checked="" type="checkbox"/> | <input type="checkbox"/> Plants                        |

| n/a                                 | Involvement in the study                        |
|-------------------------------------|-------------------------------------------------|
| <input checked="" type="checkbox"/> | <input type="checkbox"/> ChIP-seq               |
| <input checked="" type="checkbox"/> | <input type="checkbox"/> Flow cytometry         |
| <input checked="" type="checkbox"/> | <input type="checkbox"/> MRI-based neuroimaging |
